# Supplementary material for: Rhodium(i) complexes of unsymmetrical diphosphines: efficient and stable methanol carbonylation catalysts
Source: Royal Society of Chemistry journal article supplement (doi:10.1039/b002802i), 2000-01-01
Supplement: b002802i.doc [file b002802i.doc]

In a typical experiment the diphosphine (2.5 mmol) is added to a vigorously stirred solution of [Rh2Cl2(CO)4] (0.24 g, 0.62 mmol) in methanol (12.3 g, 384 mmol) in a 300 cm3 autoclave. The autoclave was then sealed and flushed with CO. Water (18.8 g) and acetic acid (96.7 g) were added and then the autoclave was pressurised with CO to 8 barg, heated to 185 ˚C and stirred (1500 rpm). Once stable at this temperature, the total pressure was increased to 22 barg. Then MeI (22.5 g) mixed with acetic acid (2.5 g) was injected using an overpressure of CO. The final pressure of 28 barg was kept constant using CO fed from a ballast vessel. The total gas uptake was monitored every 12 s using data logging facilities and rates were calculated at intervals throughout the reaction. After 2 h, a second aliquot of MeOH (9.3 cm3) was added and the uptake of CO monitored again until no further gas uptake. After 1 h the autoclave was cooled and then vented and the vent gases analysed (H2, CO2 and CH4 content was measured). The liquid product was analysed for product (CH3CO2H) and by-products (EtI, CH3CO2Et, CH3CHO and CH3CH2CO2H) by GC. A precipitate formed in each case and this was collected and analysed by IR and 31P NMR spectroscopy.
